# Supplementary material for: Boron Derivatives Accelerate Biofilm Formation of Recombinant Escherichia coli via Increasing Quorum Sensing System Autoinducer-2 Activity
Source: MDPI journal article supplement (doi:10.3390/ijms23158059), 2022-07-22
Supplement: s1 [file s1]

**Supplementary materials for**

**Boron derivatives accelerate biofilm formation of recombinant *Escherichia coli* via  
increasing quorum sensing system autoinducer-2 activity**

Huan Chen<sup>1</sup>, Cheng-Hai Yan<sup>1</sup>, Yu-Fan Zhan<sup>1</sup>, Li-Tian Geng<sup>1</sup>, Lin-Lin Zhu<sup>1</sup>, Lu-Chan Gong<sup>1,2</sup>,  
Jun Wang<sup>1,2,\*</sup>

<sup>1</sup> Jiangsu Key Laboratory of Sericultural Biology and Biotechnology, School of Biotechnology,  
Jiangsu University of Science and Technology, Zhenjiang, Jiangsu 212100, P R China

<sup>2</sup> Key Laboratory of Silkworm and Mulberry Genetic Improvement, Ministry of Agriculture and  
Rural Affairs, Sericultural Research Institute, Chinese Academy of Agricultural Sciences,  
Zhenjiang, Jiangsu 212100, P R China

\* Correspondence: wangjun@just.edu.cn; Tel.: +86-511-84448290

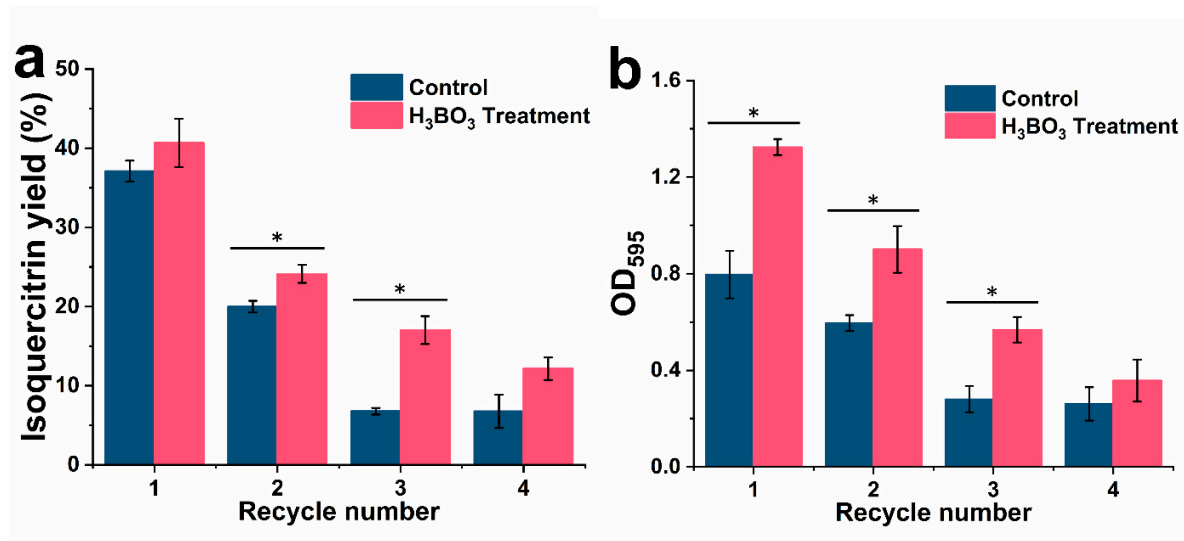

**Figure S1** Reusability of boron treated biofilm catalyst on the yield of isoquercitrin (a) and biofilm biomass (b). Reaction conditions: substrate concentration 0.05 g/L; temperature 40°C, each reaction cycle 2.5 h. \* $p < 0.05$ : significant compared with the control.

**Table S1.** Primers used for qRT-PCR.

| Primers        | Sequence (5' to 3')     | bp  | GenBank ccession No. |
|----------------|-------------------------|-----|----------------------|
| <i>rfaP</i> -F | GCGGCACGACCCTGAAAGAGAT  | 171 | NP_312532.2          |
| <i>rfaP</i> -R | ACGAGGTTCTGGTCAGCGGATT  |     |                      |
| <i>wza</i> -F  | TGACGGATACAGCCAGCGACAT  | 148 | NP_310894.1          |
| <i>wza</i> -R  | TCCAGCGGACTCCACTTTCAGT  |     |                      |
| <i>pgaA</i> -F | ACGCACCAGGAAATCAGGGACT  | 178 | NP_415543.1          |
| <i>pgaA</i> -R | GCTGCCTGCTGCCATTCTTGT   |     |                      |
| <i>bcsA</i> -F | ACGCCGCACCACTTCTTCTCA   | 157 | NP_417990.4          |
| <i>bcsA</i> -R | GACGAATCACCGCACAGGAACC  |     |                      |
| <i>luxS</i> -F | GCTGCTCATCTGGCGTACCAAT  | 175 | NP_417172.1          |
| <i>luxS</i> -R | TGCGTGCCGAACAAAGAAGTGA  |     |                      |
| <i>lsrB</i> -F | GTGAGAGTGCTGACCTGGGACT  | 108 | NP_310150.1          |
| <i>lsrB</i> -R | CGCCGCCATATCCACCAACAT   |     |                      |
| <i>aphA</i> -F | CGCTCGTGGTATCCGCATTCTG  | 118 | NP_418479.1          |
| <i>aphA</i> -R | CGCTCTCCCGCTCTGTCAAGTAT |     |                      |
| <i>motB</i> -F | TCCACTGGCGACTGCGGTTA    | 125 | NP_416403.1          |
| <i>motB</i> -R | GCTCTTCGATGTTTCGGCTGCTT |     |                      |
| <i>csgD</i> -F | ACAGCACGGAATCAGTCCTCCT  | 186 | NP_415558.1          |
| <i>csgD</i> -R | TTGCCCAGGAAACCGCTTGTG   |     |                      |
| <i>fimC</i> -F | ACGCTGATTAACCCGACACCCT  | 106 | NP_418736.3          |
| <i>fimC</i> -R | TAACCGTGCTTTCGCCCATTGG  |     |                      |
| <i>dnaE</i> -F | GCGTTATGTCGGAGGCGTAAGG  | 144 | WP_012815364.1       |
| <i>dnaE</i> -R | CGGTCATCCAGCGTGCAGATAC  |     |                      |
